# Supplementary material for: Patient-reported harm following cancellation of planned surgery at a Danish university hospital: a cross-sectional study
Source: HighWire-hosted journal article supplement (doi:10.1136/bmjopen-2023-082807), 2024-11-01
Supplement: bmjopen-2023-082807supp001_data_supplement.pdf [file bmjopen-2023-082807supp001_data_supplement.pdf]

## Survey about postponement/cancellation of planned surgery

Thank you for agreeing to participate in this study.

Please, answer each question by placing one checkmark next to the option that best applies to you. If you are unsure how to respond, please provide the best answer you can.

When we refer to "cancellation," we encompass both "postponement" and "cancellation".

Please press the "submit" button after completing the questionnaire to submit your answers.

| Cancellation                                                                                                                                                          |                                                                                                                                                                                                                     |
|-----------------------------------------------------------------------------------------------------------------------------------------------------------------------|---------------------------------------------------------------------------------------------------------------------------------------------------------------------------------------------------------------------|
| How were you informed about the cancellation of your surgery?                                                                                                         | <ul style="list-style-type: none"> <li>By e-mail</li> <li>By phone call</li> <li>At the hospital</li> </ul>                                                                                                         |
| What was the reason for the cancellation?                                                                                                                             | <ul style="list-style-type: none"> <li>Lack of operation theatre facilities due to critical patients</li> <li>Busyness</li> <li>Lack of health professionals</li> <li>Other reasons</li> <li>Do not know</li> </ul> |
| Who informed you that your surgery was cancelled?<br>(you are allowed to place more than one checkmark)                                                               | <ul style="list-style-type: none"> <li>The surgeon / another doctor</li> <li>A nurse</li> <li>A secretary</li> <li>Do not know</li> </ul>                                                                           |
| May we have permission to review your medical record for other information related to the study?<br>(cancellation date, waiting period etc.)                          | <ul style="list-style-type: none"> <li>Yes</li> <li>No</li> </ul>                                                                                                                                                   |
| Waiting following surgery cancellation                                                                                                                                |                                                                                                                                                                                                                     |
| Have you experienced a worsening in your physical health during the waiting period following the cancellation, as a result of the disease for which you need surgery? | <ul style="list-style-type: none"> <li>Not at all</li> <li>A little</li> <li>Somewhat</li> <li>Quite a bit</li> <li>Very much</li> </ul>                                                                            |
| If yes, please describe how                                                                                                                                           | <ul style="list-style-type: none"> <li></li> </ul>                                                                                                                                                                  |
| Have you experienced increased emotional strain during the waiting period following the cancellation, compared to before the cancellation?                            | <ul style="list-style-type: none"> <li>Not at all</li> <li>A little</li> <li>Somewhat</li> <li>Quite a bit</li> <li>Very much</li> </ul>                                                                            |
| If yes, please describe how                                                                                                                                           |                                                                                                                                                                                                                     |
| Has the cancellation caused that you in the waiting period afterwards have:                                                                                           |                                                                                                                                                                                                                     |
| - felt frustrated?                                                                                                                                                    | <ul style="list-style-type: none"> <li>Not at all</li> <li>A little</li> <li>Somewhat</li> <li>Quite a bit</li> <li>Very much</li> </ul>                                                                            |
| - been angry?                                                                                                                                                         | <ul style="list-style-type: none"> <li>Not at all</li> <li>A little</li> <li>Somewhat</li> <li>Quite a bit</li> <li>Very much</li> </ul>                                                                            |
| - been disappointed?                                                                                                                                                  | <ul style="list-style-type: none"> <li>Not at all</li> <li>A little</li> <li>Somewhat</li> <li>Quite a bit</li> <li>Very much</li> </ul>                                                                            |

|                                                                                                              |                                                                                                                                                    |
|--------------------------------------------------------------------------------------------------------------|----------------------------------------------------------------------------------------------------------------------------------------------------|
| - been sad?                                                                                                  | <ul style="list-style-type: none"> <li>• Not at all</li> <li>• A little</li> <li>• Somewhat</li> <li>• Quite a bit</li> <li>• Very much</li> </ul> |
| - felt lonely?                                                                                               | <ul style="list-style-type: none"> <li>• Not at all</li> <li>• A little</li> <li>• Somewhat</li> <li>• Quite a bit</li> <li>• Very much</li> </ul> |
| - been sad in a way that made you cry?                                                                       | <ul style="list-style-type: none"> <li>• Not at all</li> <li>• A little</li> <li>• Somewhat</li> <li>• Quite a bit</li> <li>• Very much</li> </ul> |
| - been more stressed than before the cancellation?                                                           | <ul style="list-style-type: none"> <li>• Not at all</li> <li>• A little</li> <li>• Somewhat</li> <li>• Quite a bit</li> <li>• Very much</li> </ul> |
| - found it difficult to sleep (as a new-onset of symptom) ?                                                  | <ul style="list-style-type: none"> <li>• Not at all</li> <li>• A little</li> <li>• Somewhat</li> <li>• Quite a bit</li> <li>• Very much</li> </ul> |
| - experienced a need for sedatives or sleeping pills due to insomnia?                                        | <ul style="list-style-type: none"> <li>• Yes</li> <li>• No</li> <li>• Do not know</li> </ul>                                                       |
| - experienced having rapid heartbeat (as a new-onset of symptom)?                                            | <ul style="list-style-type: none"> <li>• Not at all</li> <li>• A little</li> <li>• Somewhat</li> <li>• Quite a bit</li> <li>• Very much</li> </ul> |
| - experienced having stomach problems (as a new-onset of symptom)?                                           | <ul style="list-style-type: none"> <li>• Not at all</li> <li>• A little</li> <li>• Somewhat</li> <li>• Quite a bit</li> <li>• Very much</li> </ul> |
| - found it difficult to see other people, for instance visit friends, relatives (as a new-onset of symptom)? | <ul style="list-style-type: none"> <li>• Not at all</li> <li>• A little</li> <li>• Somewhat</li> <li>• Quite a bit</li> <li>• Very much</li> </ul> |
| - feared deterioration of the disease for which you need surgery?                                            | <ul style="list-style-type: none"> <li>• Not at all</li> <li>• A little</li> <li>• Somewhat</li> <li>• Quite a bit</li> <li>• Very much</li> </ul> |
| - been anxious to die from the disease for which you need surgery?                                           | <ul style="list-style-type: none"> <li>• Not at all</li> <li>• A little</li> <li>• Somewhat</li> <li>• Quite a bit</li> <li>• Very much</li> </ul> |
| - feared another surgery cancellation?                                                                       | <ul style="list-style-type: none"> <li>• Not at all</li> <li>• A little</li> <li>• Somewhat</li> <li>• Quite a bit</li> <li>• Very much</li> </ul> |

| To what extent do the following statements apply to you in the waiting period following the cancellation                                                  |                                                                                                                                                    |
|-----------------------------------------------------------------------------------------------------------------------------------------------------------|----------------------------------------------------------------------------------------------------------------------------------------------------|
| I have been able to continue my studies/working life                                                                                                      | <ul style="list-style-type: none"> <li>• Not at all</li> <li>• A little</li> <li>• Somewhat</li> <li>• Quite a bit</li> <li>• Very much</li> </ul> |
| I have been able to continue my daily activities                                                                                                          | <ul style="list-style-type: none"> <li>• Not at all</li> <li>• A little</li> <li>• Somewhat</li> <li>• Quite a bit</li> <li>• Very much</li> </ul> |
| I have experienced financial loss due to the cancellation                                                                                                 | <ul style="list-style-type: none"> <li>• Not at all</li> <li>• A little</li> <li>• Somewhat</li> <li>• Quite a bit</li> <li>• Very much</li> </ul> |
| I have experienced eroded trust in the healthcare system                                                                                                  | <ul style="list-style-type: none"> <li>• Not at all</li> <li>• A little</li> <li>• Somewhat</li> <li>• Quite a bit</li> <li>• Very much</li> </ul> |
| I have been in contact with my general practitioner about the disease for which I need surgery                                                            | <ul style="list-style-type: none"> <li>• Yes</li> <li>• No</li> </ul>                                                                              |
| - If yes, how many times                                                                                                                                  | <ul style="list-style-type: none"> <li>• 1 time</li> <li>• 2 times</li> <li>• 3 times or more</li> </ul>                                           |
| I have been in contact with the department at the hospital in the new waiting period                                                                      | <ul style="list-style-type: none"> <li>• Yes</li> <li>• No</li> </ul>                                                                              |
| - If yes, how many times                                                                                                                                  | <ul style="list-style-type: none"> <li>• 1 time</li> <li>• 2 times</li> <li>• 3 times or more</li> </ul>                                           |
| I have experienced a need of a stronger or higher dose of analgesics in the extended waiting period                                                       | <ul style="list-style-type: none"> <li>• Yes</li> <li>• No</li> </ul>                                                                              |
| The cancellation has caused other consequences for me and my family                                                                                       | <ul style="list-style-type: none"> <li>• Yes</li> <li>• No</li> </ul>                                                                              |
| - If yes, please describe which                                                                                                                           |                                                                                                                                                    |
| <b>Suggestions for improvement</b>                                                                                                                        |                                                                                                                                                    |
| What would have been helpful for you when your surgery was cancelled, as well as during the subsequent waiting period?<br>Please, write your suggestions: |                                                                                                                                                    |
